# Supplementary material for: Thermal and Chemical Stability of Two Homologous POZ/BTB Domains of KCTD Proteins Characterized by a Different Oligomeric Organization
Source: Hindawi journal article supplement (doi:10.1155/2013/162674), 2013-01-01
Supplement: f1 [file 162674.f1.pdf]

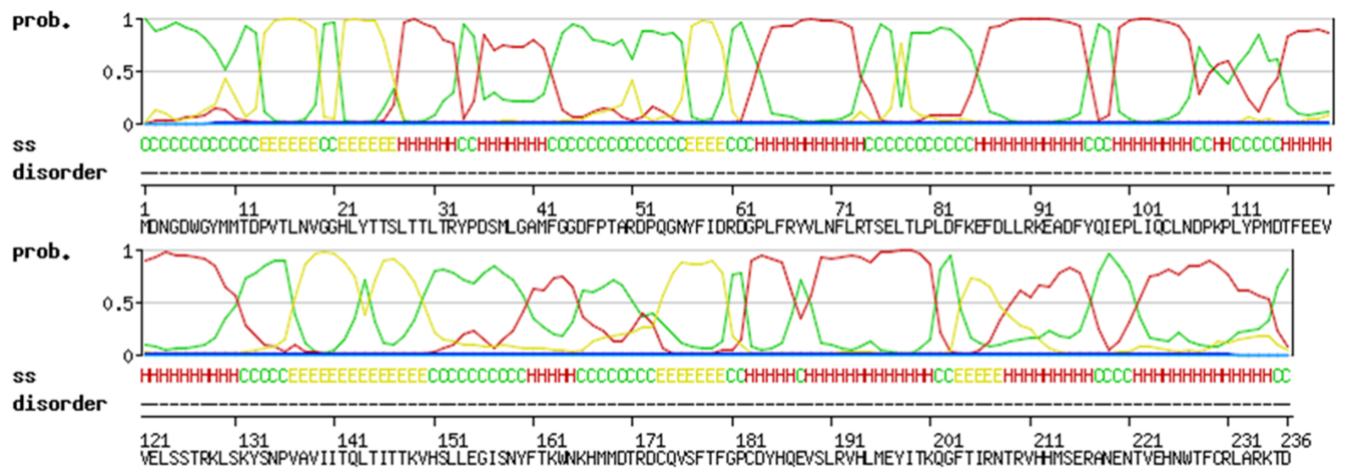

Fig. S1. Secondary structure prediction of KCTD6 (Swiss model server). In red (H) are indicated  $\alpha$ -helix, in yellow (E)  $\beta$ -sheets and in green (C) coil regions.

|                      |    |         |   |            |   |        |        |        |       |       |     |      |      |   |   |   |   |    |      |
|----------------------|----|---------|---|------------|---|--------|--------|--------|-------|-------|-----|------|------|---|---|---|---|----|------|
| KCTD5 <sub>BTB</sub> | 40 | SVSK    | W | VRLNVGGTYF | L | TTRQTL | CRDPKS | FLYRLC | QADPD | LDSDK | DET | GAYL | IDRD | P | T | Y | F | GP | VLNY |
|                      |    | :       | : | :          | : | :      | :      | :      | :     | :     | :   | :    | :    | : | : | : | : | :  | :    |
| KCTD6 <sub>BTB</sub> | 10 | TDPVT   |   |            |   |        |        |        |       |       |     |      |      |   |   |   |   |    |      |
|                      |    | LN      |   |            |   |        |        |        |       |       |     |      |      |   |   |   |   |    |      |
|                      |    | VGGHLYT |   |            |   |        |        |        |       |       |     |      |      |   |   |   |   |    |      |
|                      |    | TSLTTL  |   |            |   |        |        |        |       |       |     |      |      |   |   |   |   |    |      |
|                      |    | TRYPD   |   |            |   |        |        |        |       |       |     |      |      |   |   |   |   |    |      |
|                      |    | SMLGAM  |   |            |   |        |        |        |       |       |     |      |      |   |   |   |   |    |      |
|                      |    | F       |   |            |   |        |        |        |       |       |     |      |      |   |   |   |   |    |      |
|                      |    | FGGD--  |   |            |   |        |        |        |       |       |     |      |      |   |   |   |   |    |      |
|                      |    | FPTARD  |   |            |   |        |        |        |       |       |     |      |      |   |   |   |   |    |      |
|                      |    | PQGN    |   |            |   |        |        |        |       |       |     |      |      |   |   |   |   |    |      |
|                      |    | YFID    |   |            |   |        |        |        |       |       |     |      |      |   |   |   |   |    |      |
|                      |    | RDG     |   |            |   |        |        |        |       |       |     |      |      |   |   |   |   |    |      |
|                      |    | PLFR    |   |            |   |        |        |        |       |       |     |      |      |   |   |   |   |    |      |
|                      |    | YVLNF   |   |            |   |        |        |        |       |       |     |      |      |   |   |   |   |    |      |

  

|                      |  |        |   |   |   |   |   |   |   |    |   |   |   |      |   |   |   |   |   |   |   |   |   |   |   |   |   |   |   |   |   |   |     |   |   |   |   |     |
|----------------------|--|--------|---|---|---|---|---|---|---|----|---|---|---|------|---|---|---|---|---|---|---|---|---|---|---|---|---|---|---|---|---|---|-----|---|---|---|---|-----|
| KCTD5 <sub>BTB</sub> |  | LRHGKL | V | I | N | K | D | L | A | EE | G | V | L | -EEA | E | F | Y | N | I | T | S | L | I | K | L | V | K | D | I | R | E | R | D   | S | K | T |   | 145 |
|                      |  | :      | : | : | : | : | : | : | : | :  | : | : | : | :    | : | : | : | : | : | : | : | : | : | : | : | : | : | : | : | : | : | : | :   | : | : | : |   |     |
| KCTD6 <sub>BTB</sub> |  | LRTSEL | T | L | P | L | D | F | K | E  | F | D | L | L    | R | K | E | A | D | F | Y | Q | I | E | P | L | I | Q | C | L | N | D | --- | K | P | L | Y |     |
|                      |  |        |   |   |   |   |   |   |   |    |   |   |   |      |   |   |   |   |   |   |   |   |   |   |   |   |   |   |   |   |   |   |     |   |   |   |   |     |

Fig. S2. Sequence alignment of KCTD6<sub>BTB</sub> and KCTD5<sub>BTB</sub>. Residues involved in the interface of the pentameric KCTD5<sub>BTB</sub> are denoted in green. In red the Trp residue. The sequences reported for the two BTB/POZ domains correspond to the constructs expressed and characterized in this study.

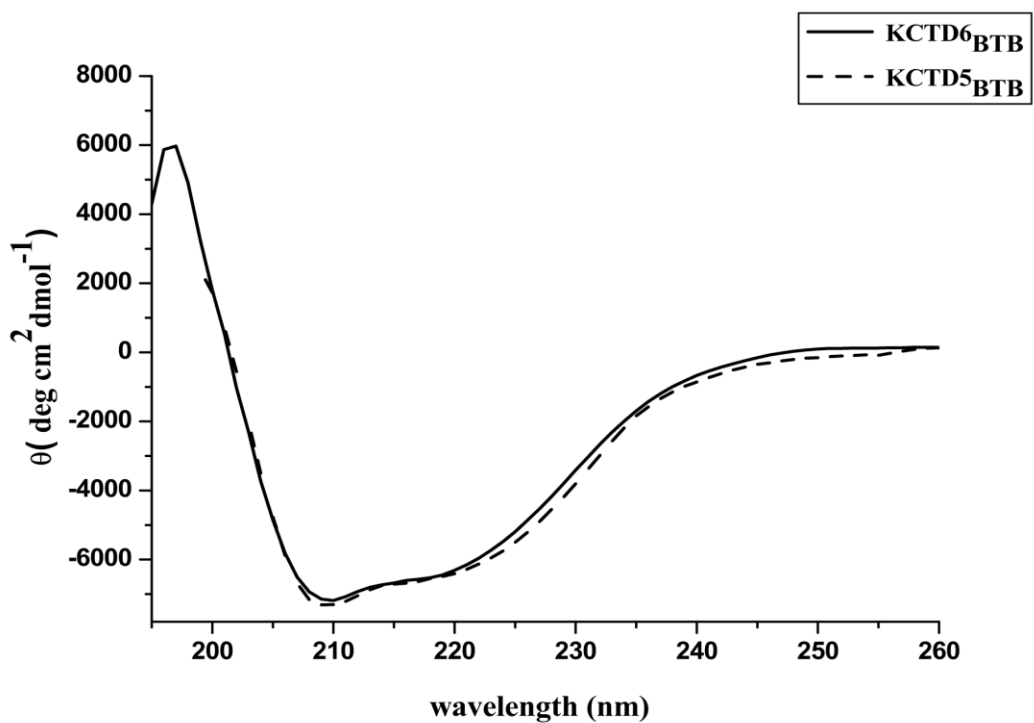

**Fig S3.** Overlay of KCTD5<sub>BTB</sub> and KCTD6<sub>BTB</sub> CD spectra, recorded at 20 °C.

| Protein               | Theoretical molecular weight (Da)   | Calculated molecular weight (Da) by light scattering | Calculated molecular weight (Da) by gel filtration * |
|-----------------------|-------------------------------------|------------------------------------------------------|------------------------------------------------------|
| KCTD5 <sub>BTB</sub>  | 72140 (pentamer) – 57712 (tetramer) | 73130 [6]                                            | 66400 [6]                                            |
| KCTD6 <sub>BTB</sub>  | 59490 (pentamer) – 47592 (tetramer) | 49990 [this work]                                    | 51100 [this work]                                    |
| KCTD11 <sub>BTB</sub> | 62120 (pentamer) – 49696 (tetramer) | 50560 [6]                                            | 46900 [6]                                            |
| KCTD12 <sub>BTB</sub> | 63065 (pentamer) – 50452 (tetramer) | 49320 [17]                                           | 44600 [Unpublished]                                  |

**Table S1:** Comparison between theoretical molecular weights of KCTDs BTB/POZ assemblies and those calculated by light scattering and gel filtration analyses. \* The experimental data derived by gel filtration were calculated using the calibration formula  $y = -0.2952x + 0.9006$  [6].
